# Supplementary material for: Effects of Iron and Zinc Biofortified Foods on Gut Microbiota In Vivo (Gallus gallus): A Systematic Review
Source: Nutrients. 2021 Jan 9;13(1):189. doi: 10.3390/nu13010189 (PMC7827887; doi:10.3390/nu13010189)
Supplement: Supplementary file 1 [file nutrients-13-00189-s001.pdf]

## Supplementary Material

**Table S1.** Risk of bias from experimental studies.

| Reference                                                     | Reed et al., (2018) | Reed et al., (2017) | Dias et al., (2018) | Dias et al., (2019) | Beasley et al., (2020) | Percentage (%) |
|---------------------------------------------------------------|---------------------|---------------------|---------------------|---------------------|------------------------|----------------|
| (1) Title                                                     | 1                   | 1                   | 1                   | 1                   | 1                      | 100            |
| (2) Abstract                                                  | 1                   | 1                   | 1                   | 1                   | 1                      | 100            |
| <i>Introduction</i>                                           |                     |                     |                     |                     |                        |                |
| (3) Background information                                    | 1                   | 0                   | 1                   | 1                   | 1                      | 80             |
| (4) Primary and secondary objectives                          | 1                   | 1                   | 1                   | 1                   | 1                      | 100            |
| <i>Methods</i>                                                |                     |                     |                     |                     |                        |                |
| (5) Ethical statement                                         | 1                   | 1                   | 1                   | 1                   | 1                      | 100            |
| (6) Study design                                              | 1                   | 1                   | 1                   | 1                   | 1                      | 100            |
| (7) Experimental procedures                                   | 1                   | 1                   | 1                   | 1                   | 1                      | 100            |
| (8) Experimental animals detail                               | 1                   | 1                   | 1                   | 1                   | 1                      | 100            |
| (9) Housing and husbandry conditions                          | 1                   | 1                   | 1                   | 1                   | 1                      | 100            |
| (10) Sample size                                              | 0                   | 0                   | 0                   | 0                   | 0                      | 0              |
| (11) Allocating animals to experimental groups                | 1                   | 1                   | 1                   | 1                   | 1                      | 100            |
| (12) Experimental outcomes                                    | 1                   | 1                   | 1                   | 1                   | 1                      | 100            |
| (13) Statistical methods                                      | 1                   | 1                   | 1                   | 1                   | 1                      | 100            |
| <i>Results</i>                                                |                     |                     |                     |                     |                        |                |
| (14) Baseline data                                            | 1                   | 1                   | 1                   | 1                   | 1                      | 100            |
| (15) Number of animals analyzed                               | 0                   | 0                   | 0                   | 0                   | 1                      | 20             |
| (16) Outcomes and estimation                                  | 1                   | 1                   | 1                   | 1                   | 1                      | 100            |
| (17) Adverse events                                           | 1                   | 1                   | 1                   | 0                   | 1                      | 80             |
| <i>Discussion</i>                                             |                     |                     |                     |                     |                        |                |
| (18) Interpretation/scientific implications/study limitations | 1                   | 1                   | 1                   | 1                   | 1                      | 100            |
| (19) Generalizability/translation/ relevance to human biology | 1                   | 1                   | 1                   | 0                   | 1                      | 80             |
| (20) Funding                                                  | 0                   | 1                   | 1                   | 1                   | 0                      | 60             |

0: not reported; 1: reported.
